# Supplementary material for: Acoustic microstreaming and augmentation of gas exchange using an oscillating membrane towards microfluidic artificial lungs
Source: Royal Society of Chemistry journal article supplement (doi:10.1039/d5lc00109a), 2025-01-01
Supplement: d5lc00109a2.pdf [file d5lc00109a2.pdf]

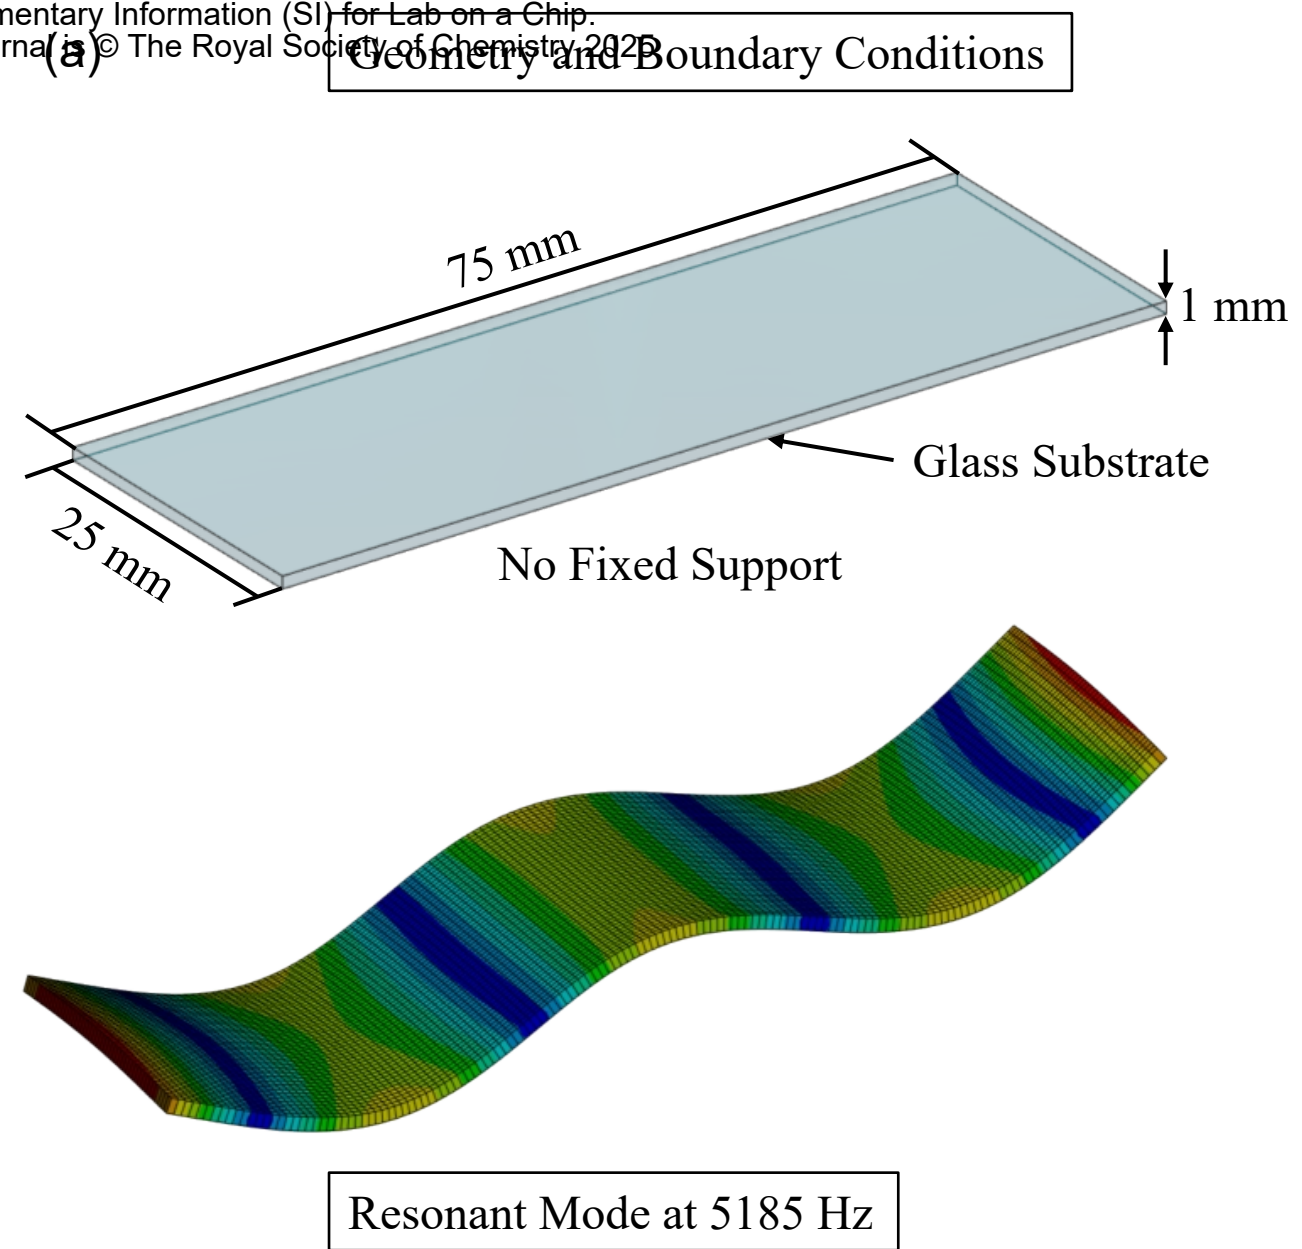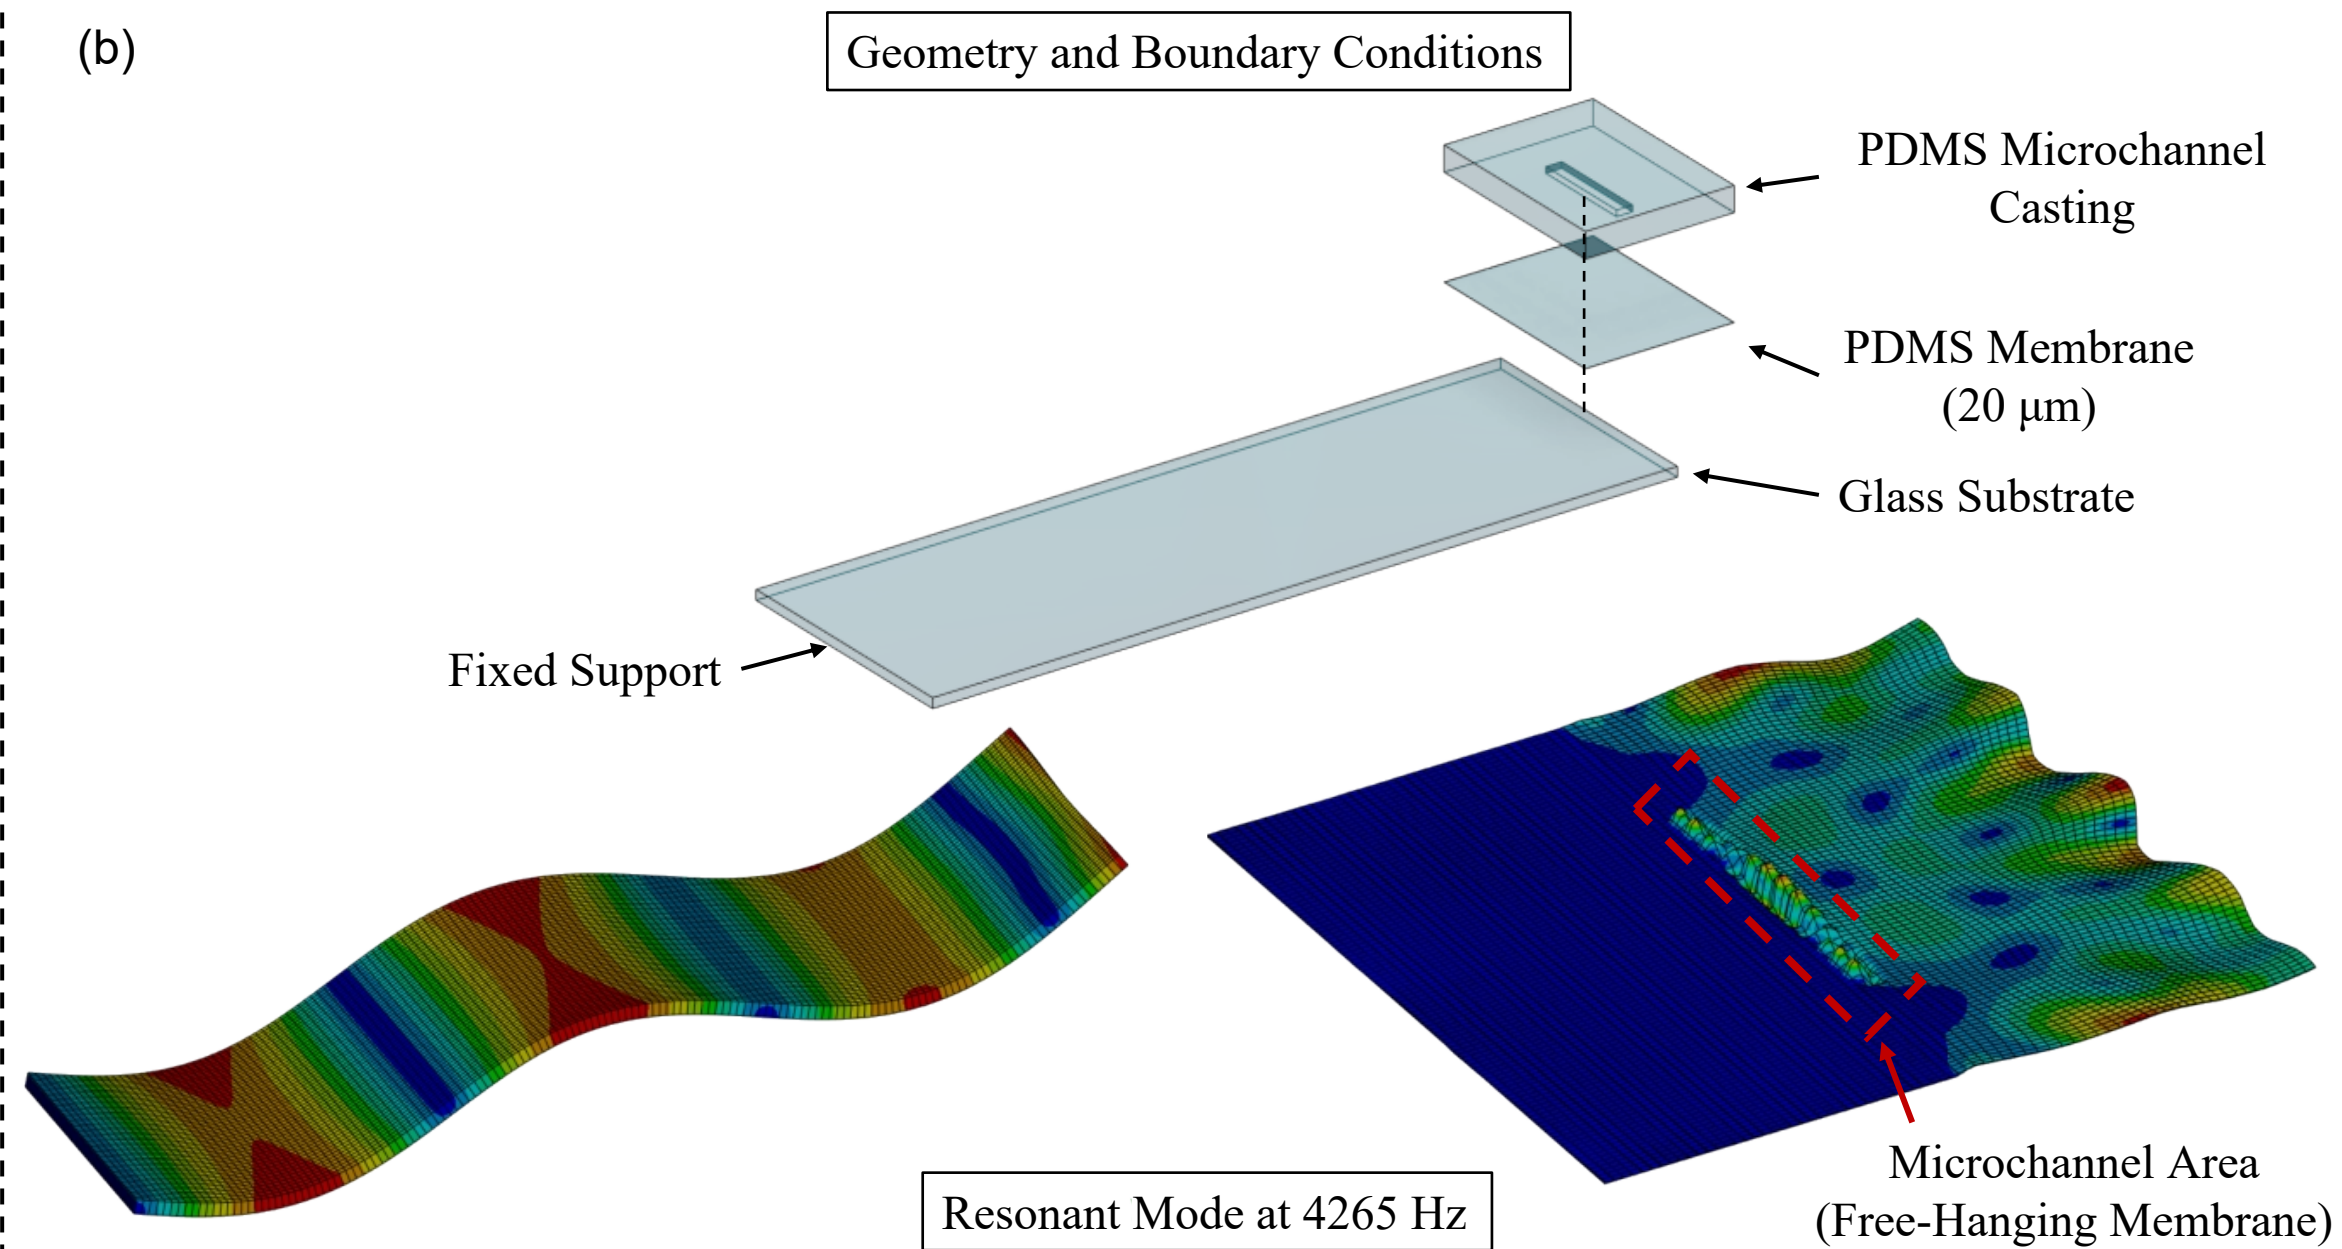

Supplementary 2: Modal analysis results for simplified geometry to represent (a) the glass substrate on its own or (b) substrate with bonded PDMS membrane and channel casting showing 3<sup>rd</sup> order lengthwise oscillation modes in the 4-6 kHz range used for actuation in experiments and corresponding membrane oscillation in the free-hanging area.
